# Supplementary material for: 20-year trends in cause-specific heart failure outcomes by sex, socioeconomic status, and place of diagnosis: a population-based study
Source: PubMed Central journal article supplement (PMC6686076; doi:10.1016/s2468-2667(19)30108-2), 2019-07-31
Supplement: mmc1.pdf [file mmc1.pdf]

# THE LANCET

## Public Health

### **Supplementary appendix**

This appendix formed part of the original submission and has been peer reviewed. We post it as supplied by the authors.

Supplement to: Lawson CA, Zaccardi F, Squire I, et al. 20-year trends in cause-specific heart failure outcomes by sex, socioeconomic status, and place of diagnosis: a population-based study. *Lancet Public Health* 2019; **4**: e406–20.

## SUPPLEMENTARY MATERIAL

### Health inequalities in heart failure; national trends in outcomes by place of diagnosis, gender and socioeconomic status: 1998-2017

Lawson CA, Zaccardi F, Squire I, Ling S, Davies M, Lam C, Mamas M, Khunti K, Kadam

UT

#### Table of Contents

|                                                                                                                                                |    |
|------------------------------------------------------------------------------------------------------------------------------------------------|----|
| <b>Supplementary Figures</b> .....                                                                                                             | 2  |
| S1 Flow chart of the patient selection process .....                                                                                           | 2  |
| S2 Proportion of HF patients diagnosed in the community or hospital by calendar year .....                                                     | 3  |
| S3 Predicted overall survival by population group .....                                                                                        | 4  |
| S4 Cumulative incidence of death by cause and population group .....                                                                           | 5  |
| <b>Supplementary Tables</b> .....                                                                                                              | 6  |
| S1 Heart failure selection CPRD code set .....                                                                                                 | 6  |
| S2 Heart failure selection ICD code set .....                                                                                                  | 7  |
| S3 Missing data .....                                                                                                                          | 8  |
| S4 Predicted rates of admissions during the second and subsequent years following HF<br>diagnosis by population groups and calendar year ..... | 9  |
| S5 Age standardised mortality risk by diagnosis time-period and population group at 1, 3<br>and 5 years following HF diagnosis .....           | 12 |
| S6 Complete case analysis: Associations between population groups .....                                                                        | 13 |

## Supplementary Figures

S1 Flow chart of the patient selection process

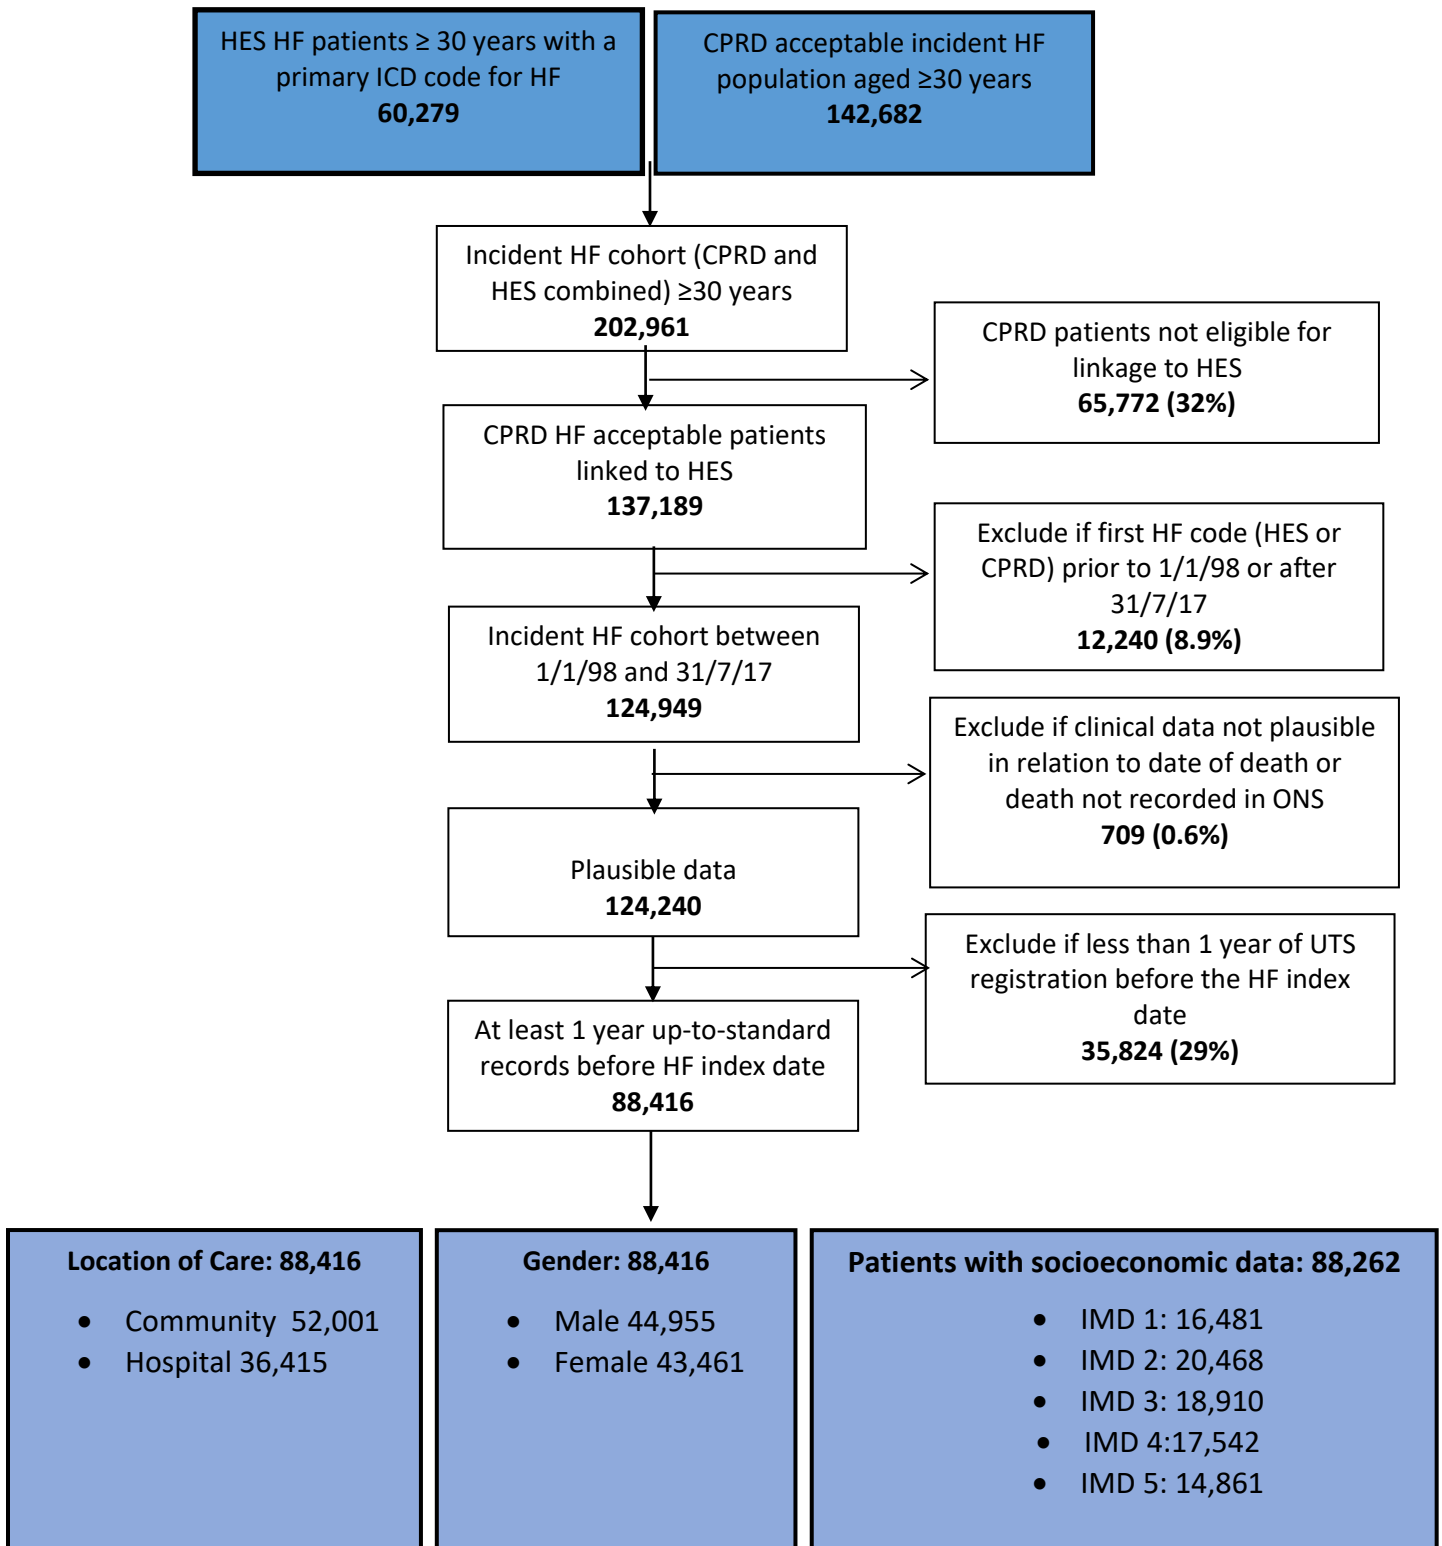

S2 Proportion of HF patients diagnosed in the community or hospital by calendar year

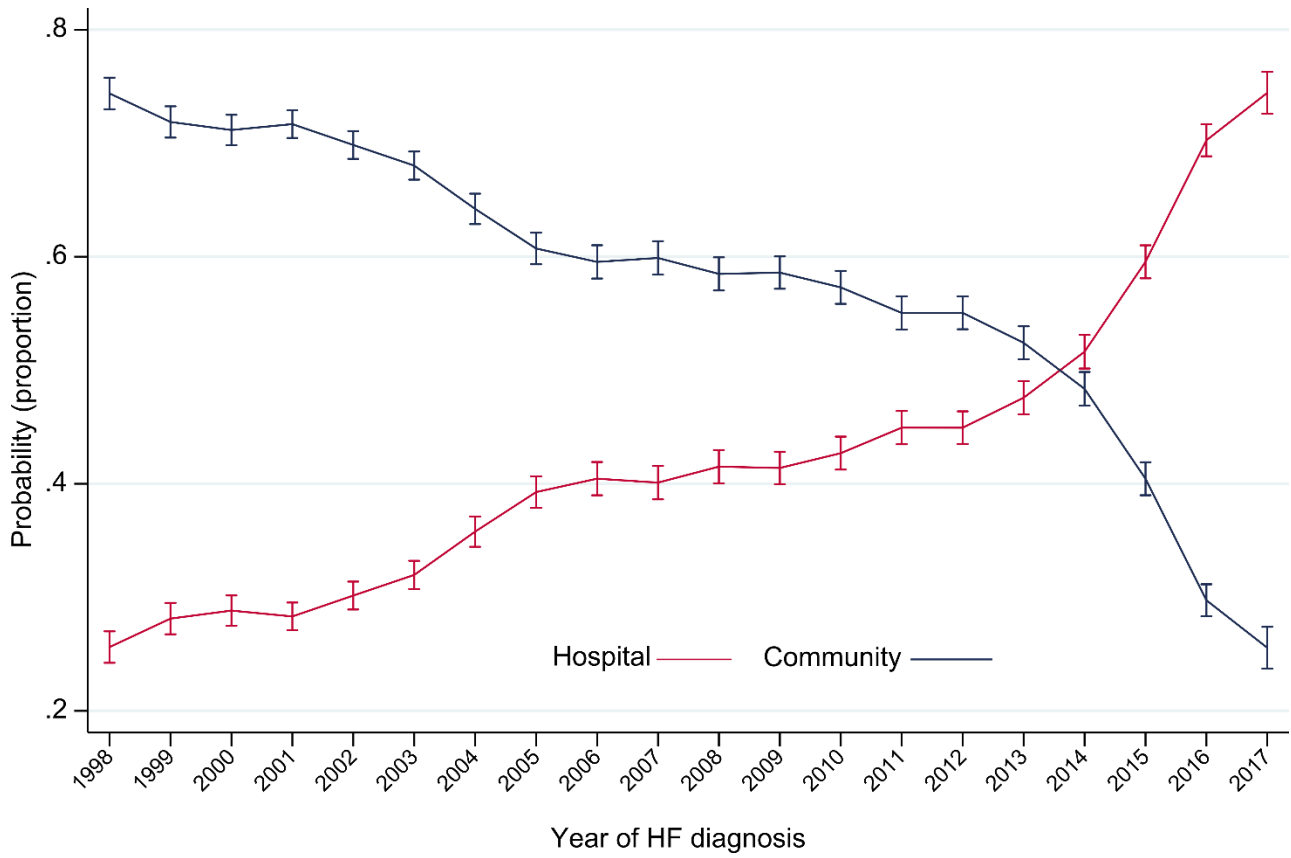

### S3 Predicted overall survival by population group

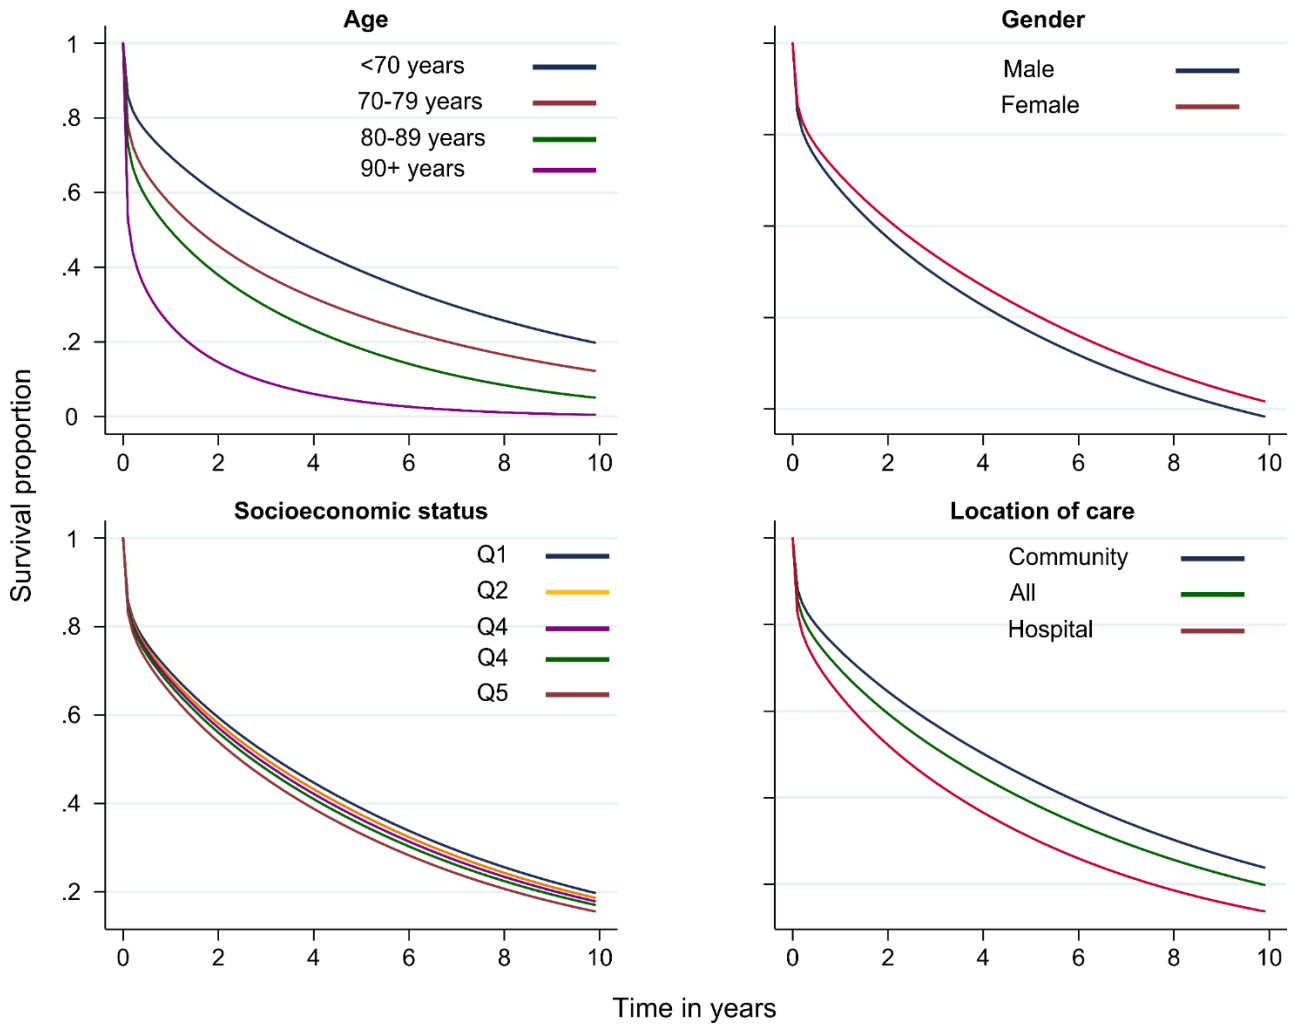

Age-standardised survival curves plotted against time in years following HF diagnosis

S4 Cumulative incidence of death by cause and population group

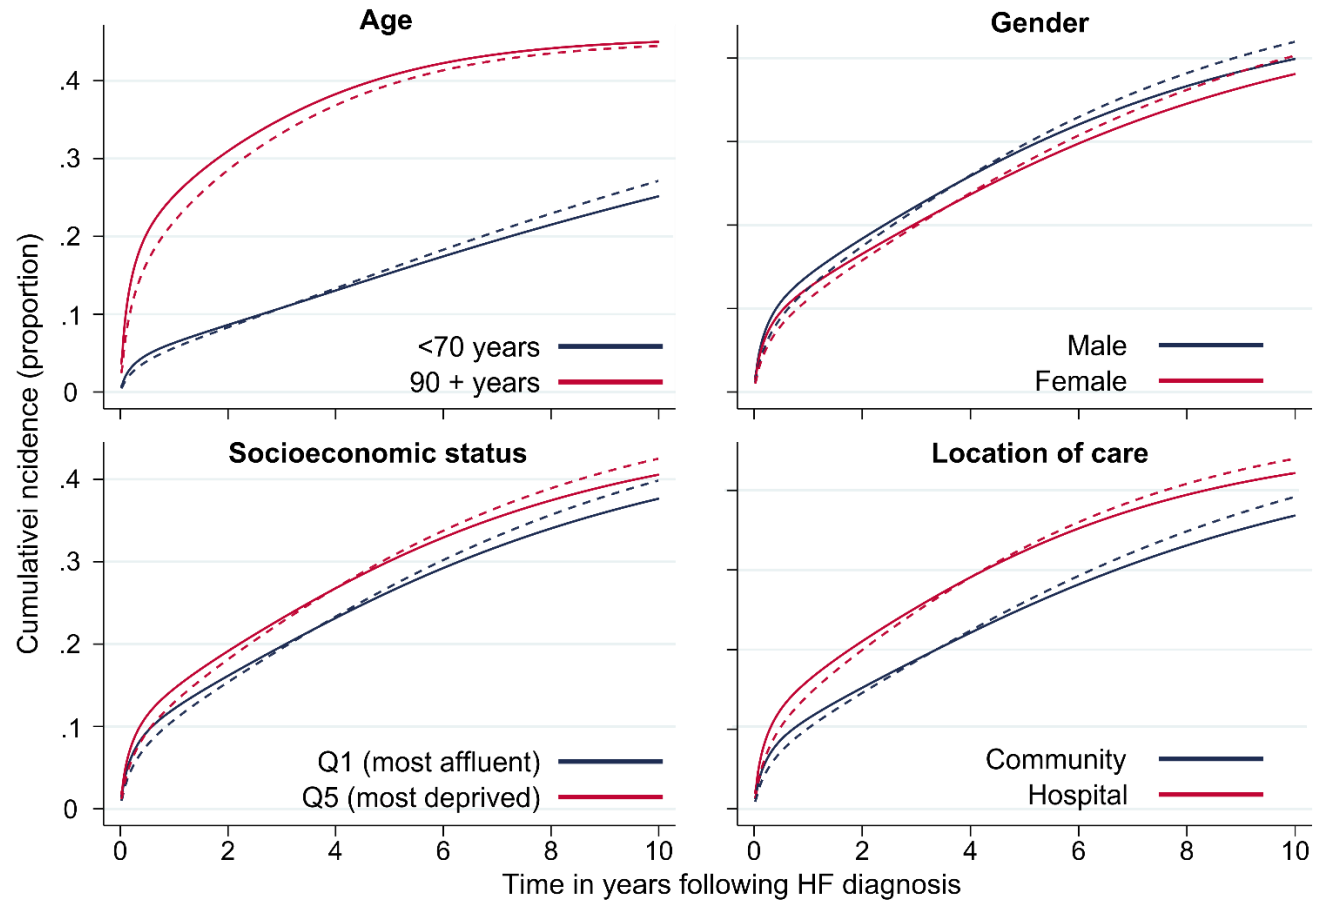

CVD death: Solid line Non-CVD death: Dashed line

Cumulative incidence curves predicted at mean population age (78 years).

## Supplementary Tables

### S1 Heart failure selection CPRD code set

| Medcode | Read code | Read term                                                   |
|---------|-----------|-------------------------------------------------------------|
| 2062    | G58..00   | Heart failure                                               |
| 1223    | G58..11   | Cardiac failure                                             |
| 398     | G580.00   | Congestive heart failure                                    |
| 2906    | G580.11   | Congestive cardiac failure                                  |
| 10079   | G580.12   | Right heart failure                                         |
| 10154   | G580.13   | Right ventricular failure                                   |
| 9524    | G580.14   | Biventricular failure                                       |
| 23707   | G580000   | Acute congestive heart failure                              |
| 32671   | G580100   | Chronic congestive heart failure                            |
| 27884   | G580200   | Decompensated cardiac failure                               |
| 11424   | G580300   | Compensated cardiac failure                                 |
| 94870   | G580400   | Congestive heart failure due to valvular disease            |
| 884     | G581.00   | Left ventricular failure                                    |
| 23481   | G581.11   | Asthma - cardiac                                            |
| 43618   | G581.12   | Pulmonary oedema - acute                                    |
| 5942    | G581.13   | Impaired left ventricular function                          |
| 5255    | G581000   | Acute left ventricular failure                              |
| 27964   | G582.00   | Acute heart failure                                         |
| 101138  | G583.00   | Heart failure with normal ejection fraction                 |
| 101137  | G583.11   | HFNEF - heart failure with normal ejection fraction         |
| 106897  | G583.12   | Heart failure with preserved ejection fraction              |
| 104275  | G584.00   | Right ventricular failure                                   |
| 4024    | G58z.00   | Heart failure NOS                                           |
| 12590   | G58z.11   | Weak heart                                                  |
| 17278   | G58z.12   | Cardiac failure NOS                                         |
| 9913    | 1O1..00   | Heart failure confirmed                                     |
| 22262   | G1yz100   | Rheumatic left ventricular failure                          |
| 21837   | G232.00   | Hypertensive heart&renal dis wth (congestive) heart failure |

## S2 Heart failure selection ICD code set

| ICD-10 Code | ICD-10 term                                                                                 |
|-------------|---------------------------------------------------------------------------------------------|
| I50         | Heart failure                                                                               |
| I50.0       | Congestive heart failure                                                                    |
| I50.1       | Left ventricular failure                                                                    |
| I50.9       | Heart failure, unspecified                                                                  |
| I11.0       | Hypertensive heart disease with (congestive) heart failure                                  |
| I13.2       | Hypertensive heart and renal disease with both (congestive) heart failure and renal failure |
| I13.0       | Hypertensive heart and renal disease with (congestive) heart failure                        |



### S3 Missing data

| Characteristics               | Missing (%) |
|-------------------------------|-------------|
| Age                           | -           |
| Gender                        | -           |
| Socioeconomic status          | 0.2         |
| Prescribed drugs              | 17.5        |
| Comorbidities                 | -           |
| Smoking                       | 5.9         |
| Alcohol                       | 14.1        |
| BMI (kg/m <sup>2</sup> )      | 14.7        |
| Systolic BP (mm/Hg)           | 2.6         |
| Cholesterol (mmol/L)          | 32.9        |
| Haemoglobin (g/dL)            | 24.7        |
| eGFR (ml/min/m <sup>2</sup> ) | 23.3        |

BMI, body mass index; BP, blood pressure; eGFR, estimated glomerular filtration rate

S4 Predicted rates of admissions during the second and subsequent years following HF diagnosis by population groups and calendar year

|                             | Predicted rate<br>per 100 person-years (95% CI) |                      | Relative<br>diff. (%) <sup>a</sup> | P<br>Interaction <sup>b</sup> | Average annual percent change per<br>year (95% CI) <sup>c</sup> | Slope change: annual percent change before<br>and after trend change (95% CI) <sup>d</sup> |       |                    |
|-----------------------------|-------------------------------------------------|----------------------|------------------------------------|-------------------------------|-----------------------------------------------------------------|--------------------------------------------------------------------------------------------|-------|--------------------|
|                             | 1998-2001                                       | 2012-2015            |                                    |                               |                                                                 | Before                                                                                     | Break | After              |
| <b>All-cause admissions</b> |                                                 |                      |                                    |                               |                                                                 |                                                                                            |       |                    |
| All                         | 81.6 (79.7, 83.5)                               | 82.9 (80.8, 85.0)    | 2                                  |                               | 0.2 (-0.6, 0.9)                                                 | 0.2 (-0.6, 0.9)                                                                            | N/A   | 0.2 (-0.6, 0.9)    |
| <70 years                   | 69.2 (65.9, 72.5)                               | 53.3 (50.7, 56.0)    | -23                                |                               | -1.5 (-2.8, -0.1)                                               |                                                                                            |       |                    |
| 70 to 79 years              | 77.8 (74.9, 80.8)                               | 76.4 (72.9, 79.9)    | -2                                 | <0.0001                       | -0.3 (-1.2, 0.5)                                                | 2.1 (0.9, 3.3)                                                                             | 2007  | -3.0 (-4.4, -1.5)  |
| 80 to 89 years              | 85.7 (82.1, 89.3)                               | 99.4 (95.3, 103.5)   | 16                                 | <0.0001                       | 1.1 (0.1, 2.1)                                                  | 3.8 (2.3, 5.3)                                                                             | 2007  | -1.9 (-3.3, -0.4)  |
| 90 years and over           | 82.1 (74.3, 89.9)                               | 121.7 (111.8, 131.6) | 48                                 | <0.0001                       | 3.2 (1.6, 4.7)                                                  | 6.3 (3.3, 9.4)                                                                             | 2006  | 0.4 (-1.3, 2.3)    |
| Men                         | 88.3 (85.3, 91.3)                               | 81.0 (78.2, 83.7)    | -8                                 |                               | -0.4 (-1.1, 0.3)                                                | -0.4 (-1.1, 0.3)                                                                           | N/A   | -0.4 (-1.1, 0.3)   |
| Women                       | 75.8 (73.4, 78.3)                               | 85.3 (82.2, 88.4)    | 13                                 | <0.0001                       | 0.7 (-0.8, 2.1)                                                 | 0.7 (-0.8, 2.1)                                                                            | N/A   | 0.7 (-0.8, 2.1)    |
| Most affluent (Q1)          | 69.0 (65.0, 73.0)                               | 69.6 (65.6, 73.5)    | 1                                  |                               | 0.2 (-1.3, 1.7)                                                 | 3.3 (-0.5, 7.4)                                                                            | 2004  | -1.5 (-2.9, 0.0)   |
| Most deprived (Q2)          | 99.0 (93.6, 104.3)                              | 101.9 (95.6, 108.1)  | 3                                  | 0.113                         | 0.4 (-1.1, 1.8)                                                 | 0.4 (-1.1, 1.8)                                                                            | N/A   | 0.4 (-1.1, 1.8)    |
| Community diagnosis         | 72.7 (70.7, 74.6)                               | 65.9 (63.7, 68.1)    | -9                                 |                               | -1.1 (-2.0, -0.2)                                               | 0.5 (-0.3, 1.4)                                                                            | 2009  | -4.0 (-6.2, -1.8)  |
| Hospital diagnosis          | 112.0 (106.7, 117.3)                            | 106.5 (102.6, 110.4) | -5                                 | 0.262                         | -0.1 (-0.9, 0.8)                                                | 3.2 (1.7, 4.8)                                                                             | 2006  | -2.9 (-4.1, -1.8)  |
| <b>HF admissions</b>        |                                                 |                      |                                    |                               |                                                                 |                                                                                            |       |                    |
| All                         | 8.8 (8.3, 9.3)                                  | 9.7 (9.1, 10.3)      | 10                                 |                               | 0.6 (-0.1, 1.4)                                                 | 0.6 (-0.1, 1.4)                                                                            | N/A   | 0.6 (-0.1, 1.4)    |
| <70                         | 7.7 (6.9, 8.6)                                  | 5.6 (4.9, 6.3)       | -27                                |                               | -2.7 (-3.9, -1.5)                                               | -2.7 (-3.9, -1.5)                                                                          | N/A   | -2.7 (-3.9, -1.5)  |
| 70 to 79                    | 8.0 (7.3, 8.7)                                  | 9.5 (8.4, 10.5)      | 19                                 | <0.0001                       | 0.8 (-0.2, 1.7)                                                 | 0.8 (-0.2, 1.7)                                                                            | N/A   | 0.8 (-0.2, 1.7)    |
| 80 to 89                    | 9.1 (8.2, 10.0)                                 | 12.0 (10.8, 13.1)    | 32                                 | <0.0001                       | 1.9 (0.2, 3.5)                                                  | 1.9 (0.2, 3.5)                                                                             | N/A   | 1.9 (0.2, 3.5)     |
| >90                         | 7.2 (5.4, 9.0)                                  | 12.3 (9.8, 14.9)     | 71                                 | <0.0001                       | 1.7 (-2.6, 6.1)                                                 | 6.0 (3.2, 8.9)                                                                             | 2012  | -16.3 (-33.8, 5.7) |
| Men                         | 10.4 (9.5, 11.2)                                | 9.9 (9.1, 10.7)      | -5                                 |                               | -0.5 (-1.3, 0.3)                                                | -0.5 (-1.3, 0.3)                                                                           | N/A   | -0.5 (-1.3, 0.3)   |
| Women                       | 7.4 (6.9, 8.0)                                  | 9.5 (8.6, 10.3)      | 28                                 | <0.0001                       | 1.5 (0.3, 2.7)                                                  | 1.5 (0.3, 2.7)                                                                             | N/A   | 1.5 (0.3, 2.7)     |
| Most affluent               | 6.9 (6.0, 7.9)                                  | 8.8 (7.7, 10.0)      | 28                                 |                               | 1.2 (-0.1, 2.5)                                                 | 1.2 (-0.1, 2.5)                                                                            | N/A   | 1.2 (-0.1, 2.5)    |

|                             |                   |                    |     |         |                   |                   |      |                   |
|-----------------------------|-------------------|--------------------|-----|---------|-------------------|-------------------|------|-------------------|
| Most deprived               | 10.2 (9.0, 11.5)  | 11.9 (10.2, 13.6)  | 17  | 0.582   | 0.7 (-0.4, 1.7)   | 0.7 (-0.4, 1.7)   | N/A  | 0.7 (-0.4, 1.7)   |
| Community diagnosis         | 6.4 (6.0, 6.8)    | 6.5 (6.0, 7.1)     | 2   |         | 0.0 (-1.8, 1.9)   | 3.4 (-0.3, 7.3)   | 2005 | -2.3 (-4.4, -0.1) |
| Hospital diagnosis          | 17.4 (15.6, 19.2) | 14.2 (13.0, 15.4)  | -18 | 0.040   | -1.7 (-3.0, -0.4) | -1.7 (-3.0, -0.4) | N/A  | -1.7 (-3.0, -0.4) |
| <b>Other CVD admissions</b> |                   |                    |     |         |                   |                   |      |                   |
| All                         | 14.1 (13.6, 14.7) | 11.7 (11.1, 12.2)  | -17 |         | -1.3 (-2.2, -0.4) | 0.9 (-0.3, 2.1)   | 2007 | -3.8 (-5.4, -2.2) |
| <70                         | 12.8 (11.8, 13.7) | 9.6 (8.8, 10.5)    | -25 |         | -1.9 (-2.7, -1.0) | -1.9 (-2.7, -1.0) | N/A  | -1.9 (-2.7, -1.0) |
| 70 to 79                    | 13.8 (13.0, 14.7) | 10.9 (10.0, 11.9)  | -21 | 0.150   | -1.2 (-2.7, 0.2)  | -1.2 (-2.7, 0.2)  | N/A  | -1.2 (-2.7, 0.2)  |
| 80 to 89                    | 14.2 (13.2, 15.2) | 12.4 (11.4, 13.4)  | -13 | 0.011   | -1.1 (-2.7, 0.6)  | 2.9 (0.6, 5.2)    | 2007 | -5.3 (-8.1, -2.5) |
| >90                         | 13.6 (11.3, 15.9) | 14.9 (12.5, 17.2)  | 10  | <0.0001 | 1.4 (-0.5, 3.2)   | 1.4 (-0.5, 3.2)   | N/A  | 1.4 (-0.5, 3.2)   |
| Men                         | 15.8 (14.9, 16.7) | 12.0 (11.2, 12.7)  | -24 |         | -1.6 (-2.5, -0.8) |                   | N/A  |                   |
| Women                       | 12.8 (12.1, 13.4) | 11.3 (10.6, 12.1)  | -12 | 0.003   | -0.7 (-1.4, 0.0)  | 2.3 (1.1, 3.6)    | 2006 | -3.3 (-4.4, -2.3) |
| Most affluent               | 12.3 (11.2, 13.4) | 9.3 (8.3, 10.3)    | -24 |         | -1.8 (-3.3, -0.4) | -1.8 (-3.3, -0.4) | N/A  | -1.8 (-3.3, -0.4) |
| Most deprived               | 15.7 (14.4, 17.1) | 13.3 (11.7, 14.8)  | -15 | 0.151   | -0.8 (-2.1, 0.5)  | -0.8 (-2.1, 0.5)  | N/A  | -0.8 (-2.1, 0.5)  |
| Community diagnosis         | 12.5 (12.0, 13.1) | 10.4 (9.8, 11.1)   | -17 |         | -1.6 (-2.7, -0.4) | -0.2 (-1.1, 0.7)  | 2010 | -4.7 (-8.4, -0.8) |
| Hospital diagnosis          | 20.0 (18.5, 21.5) | 13.4 (12.5, 14.3)  | -33 | <0.0001 | -2.8 (-4.2, -1.3) | 0.0 (-1.7, 1.8)   | 2007 | -5.8 (-8.4, -3.1) |
| <b>Non CVD admissions</b>   |                   |                    |     |         |                   |                   |      |                   |
| All                         | 58.5 (57.0, 60.0) | 64.0 (62.3, 65.8)  | 9   |         | 0.8 (0.1, 1.5)    | 3.6 ((2.4, 4.8)   | 2006 | -1.6 (-2.5, -0.7) |
| <70                         | 48.4 (45.9, 50.9) | 39.7 (37.5, 41.8)  | -18 |         | -0.9 (-2.7, 0.9)  | -0.9 (-2.7, 0.9)  | N/A  | -0.9 (-2.7, 0.9)  |
| 70 to 79                    | 55.6 (53.4, 57.9) | 58.3 (55.4, 61.2)  | 5   | <0.0001 | 0.1 (-0.9, 1.2)   | 2.8 (1.3, 4.4)    | 2007 | -2.8 (-4.6, -1.0) |
| 80 to 89                    | 62.3 (59.5, 65.1) | 78.5 (75.0, 82.0)  | 26  | <0.0001 | 1.7 (0.7, 2.8)    | 4.0 (2.2, 5.7)    | 2007 | -0.7, -2.3, 0.9)  |
| >90                         | 60.7 (54.4, 67.0) | 96.1 (87.7, 104.5) | 58  | <0.0001 | 3.0 (2.0, 4.0)    | 3.0 (2.0, 4.0)    | N/A  | 3.0 (2.0, 4.0)    |
| Men                         | 62.1 (59.9, 64.4) | 61.7 (59.5, 64.0)  | -1  |         | 0.2 (-0.6, 1.0)   | 0.2 (-0.6, 1.0)   | N/A  | 0.2 (-0.6, 1.0)   |
| Women                       | 55.3 (53.4, 57.2) | 66.8 (64.1, 69.4)  | 21  | <0.0001 | 1.0 (-0.7, 2.8)   | 1.0 (0.7, 2.8)    | N/A  | 1.0 (0.7, 2.8)    |
| Most affluent (Q1)          | 49.2 (46.1, 52.2) | 53.8 (50.5, 57.1)  | 9   |         | 0.4 (-0.5, 1.3)   | 0.4 (-0.5, 1.3)   | N/A  | 0.4 (-0.5, 1.3)   |
| Most deprived (Q5)          | 73.5 (69.3, 77.8) | 80.3 (75.0, 85.6)  | 9   | 0.200   | 0.8 (-0.9, 2.5)   | 0.8 (-0.9, 2.5)   | N/A  | 0.8 (-0.9, 2.5)   |
| Community diagnosis         | 53.8 (52.3, 55.4) | 50.8 (49.0, 52.6)  | -6  |         | -0.8 (-1.7, 0.1)  | 0.7 (-0.2, 1.6)   | 2009 | -3.5 (-5.7, -1.2) |

|                    |                   |                   |    |         |                |                |      |                   |
|--------------------|-------------------|-------------------|----|---------|----------------|----------------|------|-------------------|
| Hospital diagnosis | 74.2 (70.4, 78.0) | 82.6 (79.3, 85.8) | 11 | <0.0001 | 1.1 (0.2, 2.0) | 5.8 (4.2, 7.5) | 2006 | -2.9 (-4.0, -1.8) |
|--------------------|-------------------|-------------------|----|---------|----------------|----------------|------|-------------------|

Rates were conducted in survivors of the first year. With the exception of age groups, all predictions are at the mean population age (78 years). Follow up was until death or study end. Relative diff., relative difference; py, person-years; CI, confidence interval.

a relative percentage difference in admission rates (per 100 person-years) between the first and second diagnosis time periods, calculated by  $100 * ([\text{time-period 2} - \text{time period 1}] / \text{time-period 1})$ .

b P value for the difference in trend lines between groups. Estimated by fitting an interaction term between calendar year and group in the negative binomial models also containing age.

c Average annual percentage change in rates (per 100 person-years) for each increasing year of diagnosis

d Change in slope estimated using Joinpoint regression.

### S5 Age standardised mortality risk by diagnosis time-period and population group at 1, 3 and 5 years following HF diagnosis

| Calendar year of diagnosis | 1-year     |            | 3-year     |            | 5-year     |            |
|----------------------------|------------|------------|------------|------------|------------|------------|
|                            | 1998-2001  | 2012-2015  | 1998-2001  | 2012-2015  | 1998-2001  | 2012-2015  |
| All                        | 32 (31,32) | 29 (28,29) | 50 (50,51) | 46 (46,47) | 63 (62,63) | 59 (58,59) |
| <70 years                  | 14 (14,15) | 12 (12,13) | 25 (24,26) | 22 (22,23) | 35 (34,36) | 31 (30,32) |
| 70 to 79 years             | 25 (24,25) | 22 (21,22) | 42 (41,42) | 37 (37,38) | 55 (54,56) | 50 (49,51) |
| 80 to 89 years             | 39 (39,40) | 35 (35,36) | 61 (60,62) | 56 (55,57) | 75 (75,76) | 70 (70,71) |
| 90 years and over          | 58 (57,58) | 53 (52,53) | 80 (79,81) | 76 (75,76) | 91 (90,91) | 88 (87,88) |
| Men                        | 34 (33,34) | 30 (30,31) | 52 (52,53) | 48 (47,49) | 65 (64,66) | 61 (60,61) |
| Women                      | 30 (30,31) | 27 (27,28) | 48 (48,49) | 44 (43,45) | 61 (60,61) | 56 (56,57) |
| Q1 Most affluent           | 29 (29,30) | 27 (26,27) | 47 (46,48) | 43 (43,44) | 59 (59,60) | 56 (55,57) |
| Q2                         | 31 (30,31) | 28 (27,29) | 49 (48,49) | 45 (44,46) | 61 (61,62) | 57 (57,58) |
| Q3                         | 32 (31,32) | 29 (28,30) | 50 (49,51) | 46 (45,47) | 63 (62,63) | 59 (58,60) |
| Q4                         | 33 (32,33) | 30 (29,31) | 51 (51,52) | 48 (47,48) | 64 (63,65) | 60 (59,61) |
| Q5 Most deprived           | 35 (34,36) | 32 (31,33) | 54 (53,55) | 50 (49,51) | 66 (66,67) | 63 (62,64) |
| Community diagnosis        | 29 (28,29) | 24 (23,24) | 46 (46,47) | 40 (39,40) | 59 (59,60) | 52 (51,53) |
| Hospital diagnosis         | 39 (39,40) | 34 (33,34) | 60 (59,60) | 53 (52,53) | 72 (72,73) | 66 (65,66) |

Risk is reported as percentages with 95% Confidence intervals. Q: quintile

## S6 Complete case analysis: Associations between population groups

| Group                                        | All<br>Adjusted <sup>a</sup> | CVD<br>Adjusted <sup>a</sup> | Non-CVD<br>Adjusted <sup>a</sup> |
|----------------------------------------------|------------------------------|------------------------------|----------------------------------|
| <b>Hospital Admissions (IRR with 95% CI)</b> |                              |                              |                                  |
| <70 years                                    | 1.0                          | 1.0                          | 1.0                              |
| 70 to 79 years                               | 1.19 (1.15, 1.24)            | 1.11 (1.06, 1.17)            | 1.23 (1.19, 1.28)                |
| 80 to 89 years                               | 1.48 (1.42, 1.54)            | 1.41 (1.34, 1.50)            | 1.52 (1.45, 1.58)                |
| 90 years and above                           | 1.79 (1.70, 1.90)            | 1.70 (1.57, 1.85)            | 1.83 (1.72, 1.94)                |
| Male (ref)                                   | 1.0                          | 1.0                          | 1.0                              |
| Female                                       | 0.90 (0.87, 0.92)            | 0.86 (0.83, 0.90)            | 0.90 (0.88, 0.93)                |
| Socioeconomic status                         |                              |                              |                                  |
| Q1 Most affluent (ref)                       | 1.0                          | 1.0                          | 1.0                              |
| Q2                                           | 1.06 (1.02, 1.10)            | 1.08 (1.02, 1.14)            | 1.04 (1.00, 1.08)                |
| Q3                                           | 1.06 (1.02, 1.10)            | 1.08 (1.02, 1.14)            | 1.05 (1.00, 1.09)                |
| Q4                                           | 1.15 (1.10, 1.19)            | 1.14 (1.07, 1.21)            | 1.15 (1.10, 1.19)                |
| Q5 Most deprived                             | 1.17 (1.12, 1.21)            | 1.16 (1.10, 1.24)            | 1.17 (1.11, 1.22)                |
| Community (ref)                              | 1.0                          | 1.0                          | 1.0                              |
| Hospital                                     | 1.54 (1.50, 1.58)            | 1.73 (1.66, 1.80)            | 1.45 (1.41, 1.49)                |
| <b>Death (HR with 95% CI)</b>                |                              |                              |                                  |
| <70 years                                    |                              |                              |                                  |
| 70 to 79 years                               | 1.56 (1.50, 1.63)            | 1.43 (1.36, 1.51)            | 1.68 (1.57, 1.79)                |
| 80 to 89 years                               | 2.55 (2.44, 2.66)            | 2.37 (2.24, 2.50)            | 2.64 (2.46, 2.83)                |
| 90 years and above                           | 4.08 (3.87, 4.30)            | 3.72 (3.46, 3.99)            | 4.37 (3.98, 4.78)                |
| Male (ref)                                   | 1.0                          | 1.0                          | 1.0                              |
| Female                                       | 0.84 (0.82, 0.87)            | 0.85 (0.82, 0.88)            | 0.84 (0.80, 0.88)                |
| Socioeconomic status                         |                              |                              |                                  |
| Q1 Most affluent (ref)                       | 1.0                          | 1.0                          | 1.0                              |
| Q2                                           | 1.05 (1.02, 1.09)            | 1.09 (1.04, 1.14)            | 1.01 (0.95, 1.08)                |
| Q3                                           | 1.05 (1.02, 1.09)            | 1.11 (1.05, 1.16)            | 1.00 (0.94, 1.07)                |
| Q4                                           | 1.11 (1.07, 1.15)            | 1.11 (1.06, 1.17)            | 1.11 (1.04, 1.18)                |
| Q5 Most deprived                             | 1.13 (1.09, 1.17)            | 1.14 (1.08, 1.20)            | 1.13 (1.05, 1.20)                |
| Community (ref)                              | 1.0                          | 1.0                          | 1.0                              |
| Hospital                                     | 1.51 (1.47, 1.55)            | 1.61 (1.56, 1.67)            | 1.32 (1.26, 1.37)                |

IRR; Incidence rate ratio, CI; Confidence interval, Q; quintile

a adjusted for age gender socioeconomic status, ethnicity, place of diagnosis, calendar year, beta-blocker, angiotensin converting enzyme inhibitor, angiotensin receptor blocker; aldosterone antagonist, aspirin, loop diuretic, number of comorbidities, ischaemic heart disease, myocardial infarction, atrial fibrillation, hypertension, diabetes, stroke, anaemia, obesity, chronic kidney disease, chronic obstructive pulmonary disease, asthma, depression, osteoarthritis, cancer and dementia, smoking, alcohol, body mass index, systolic blood pressure, cholesterol, haemoglobin and estimated glomerular filtration rate.
